# Supplementary material for: Honokiol Prevents Non-Alcoholic Steatohepatitis-Induced Liver Cancer via EGFR Degradation through the Glucocorticoid Receptor—MIG6 Axis
Source: MDPI journal article supplement (doi:10.3390/cancers13071515), 2021-03-25

# Fig3B

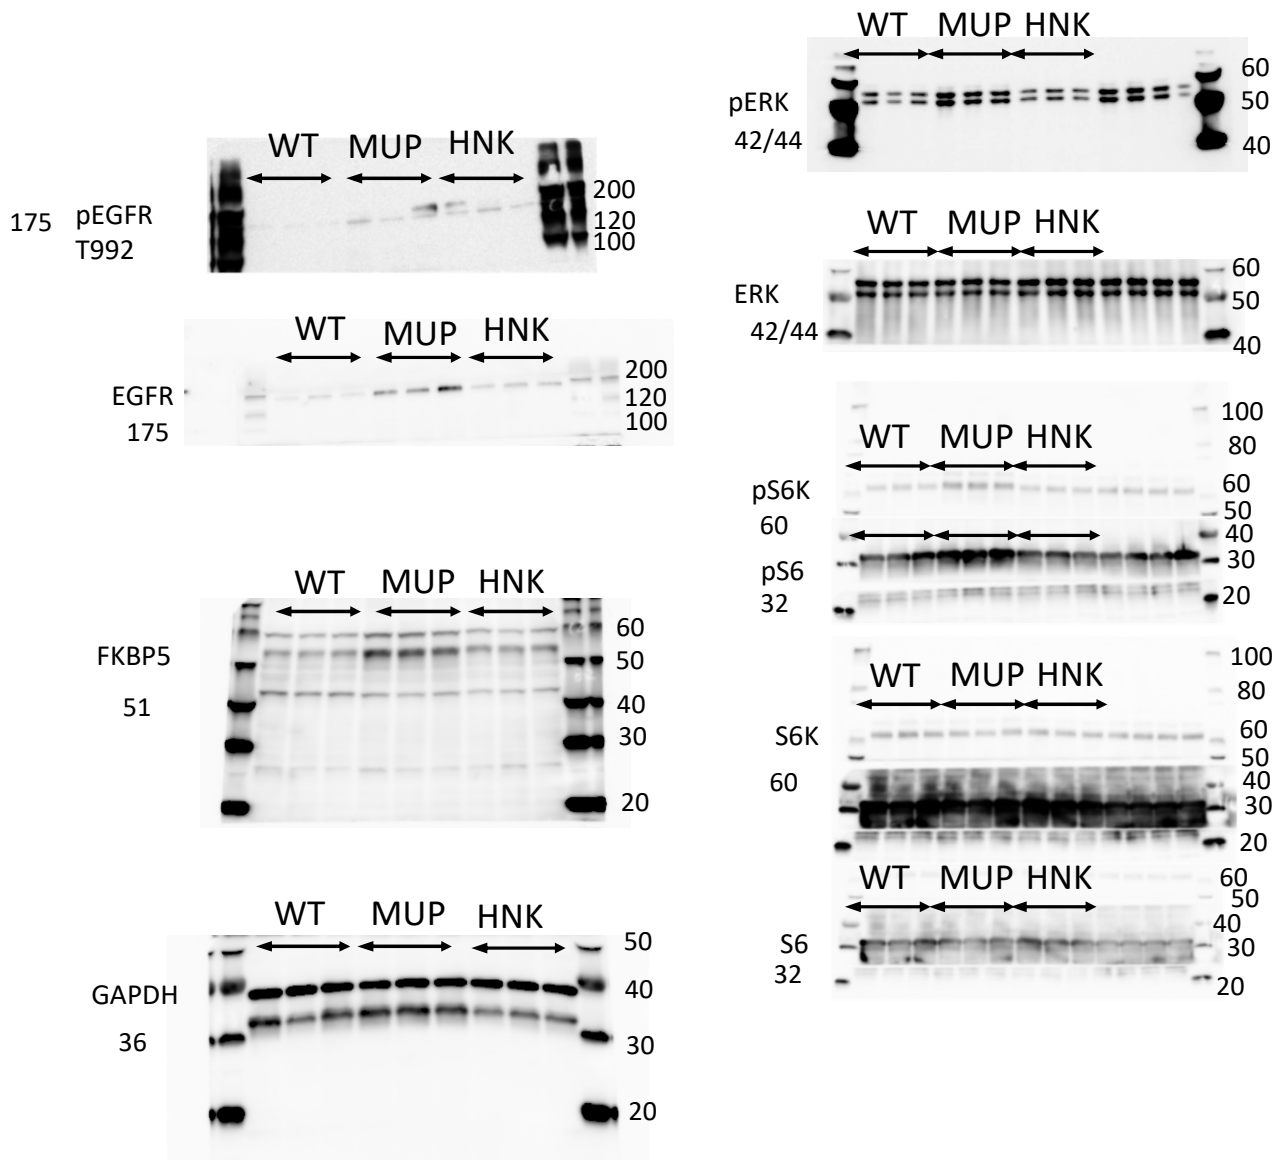

The antibodies used for immunoblotting are listed in the Supplementary Materials and Methods.

Fig3E

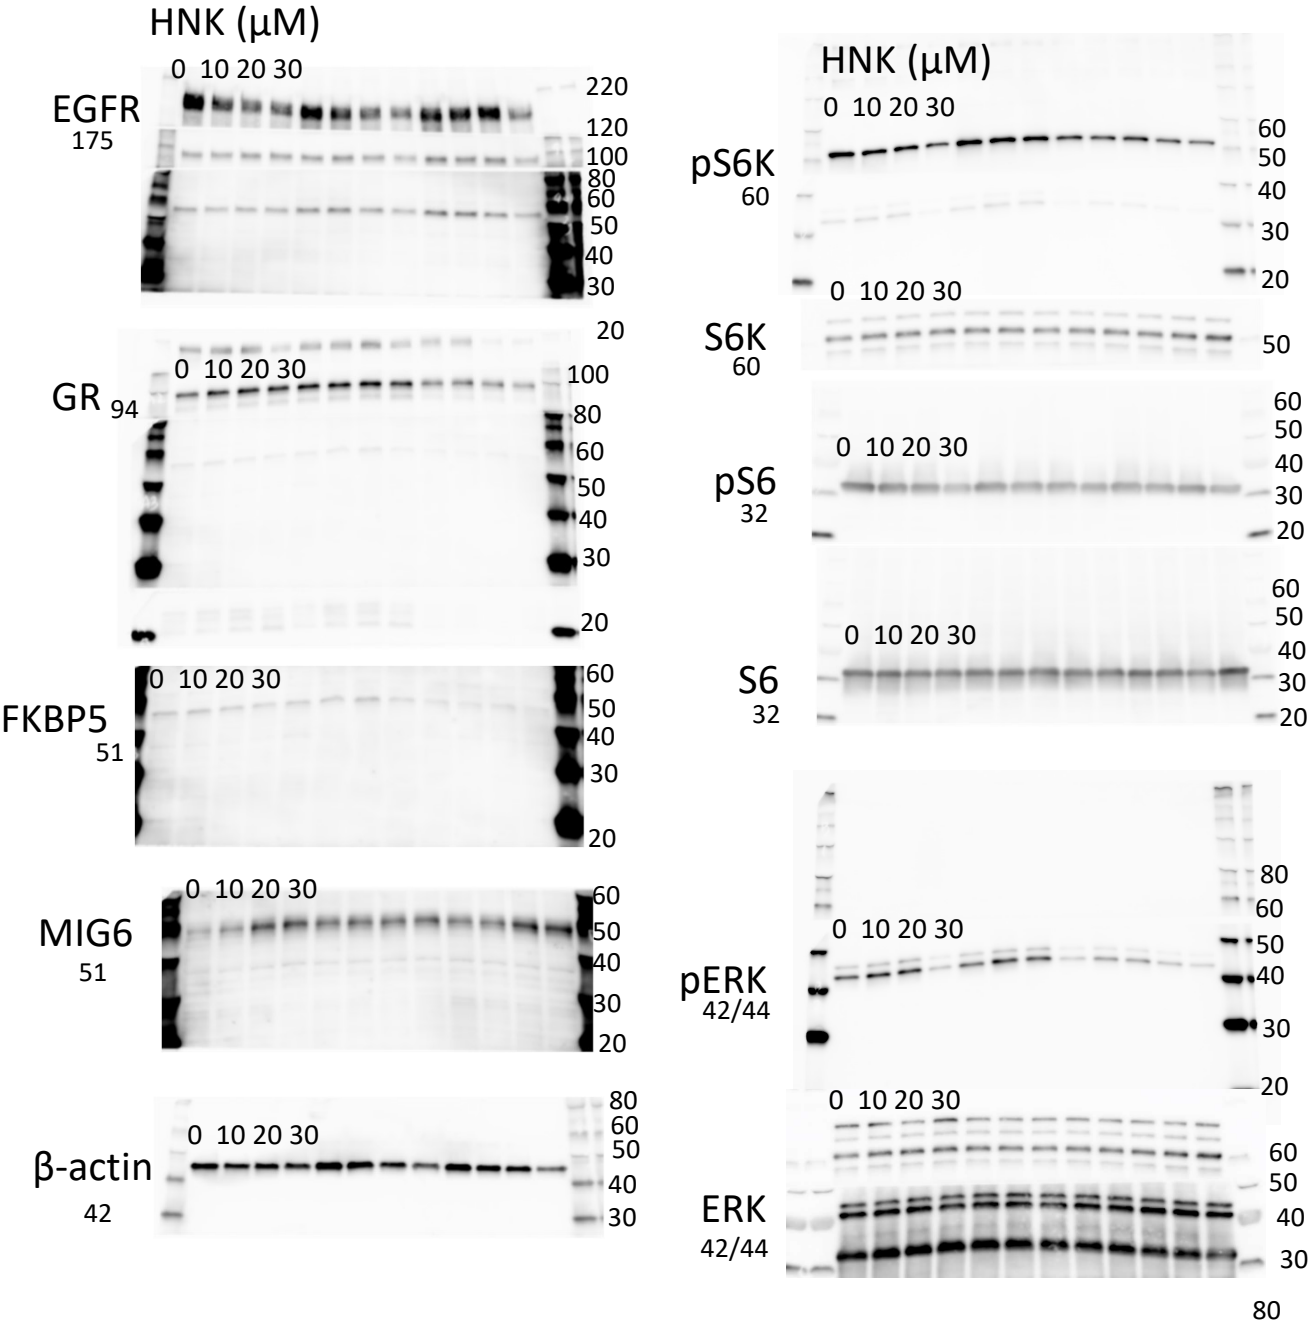

Fig4C

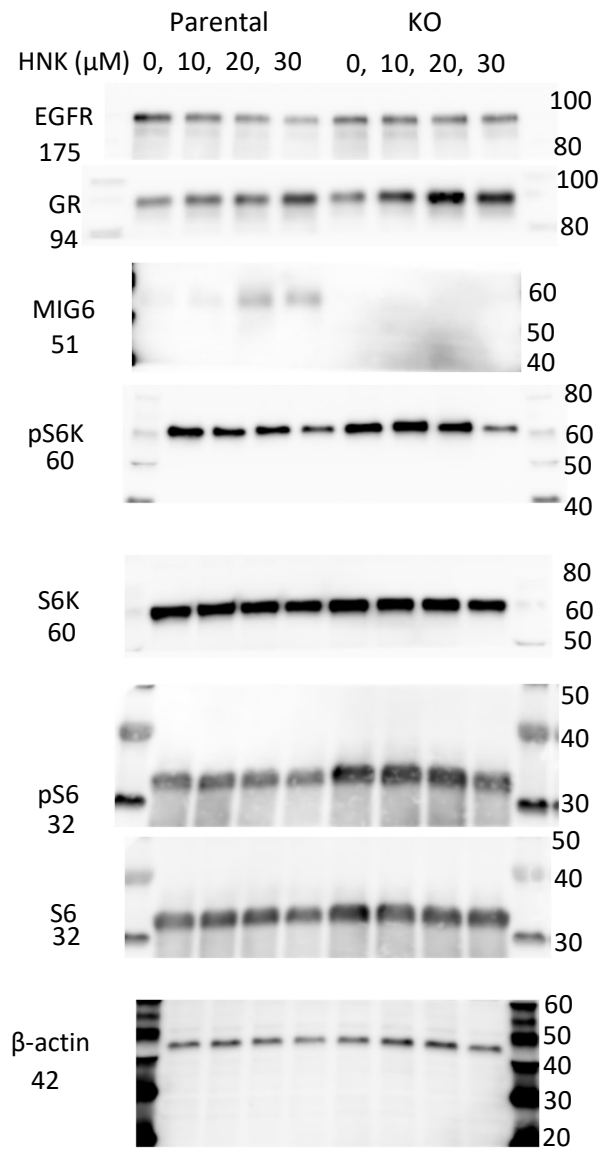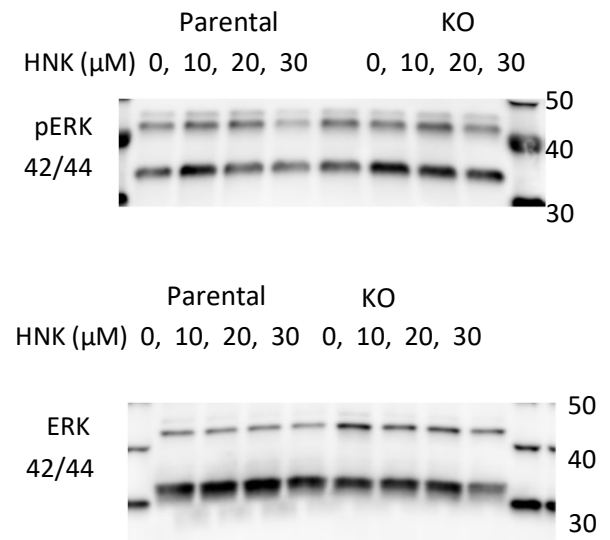

Fig5B

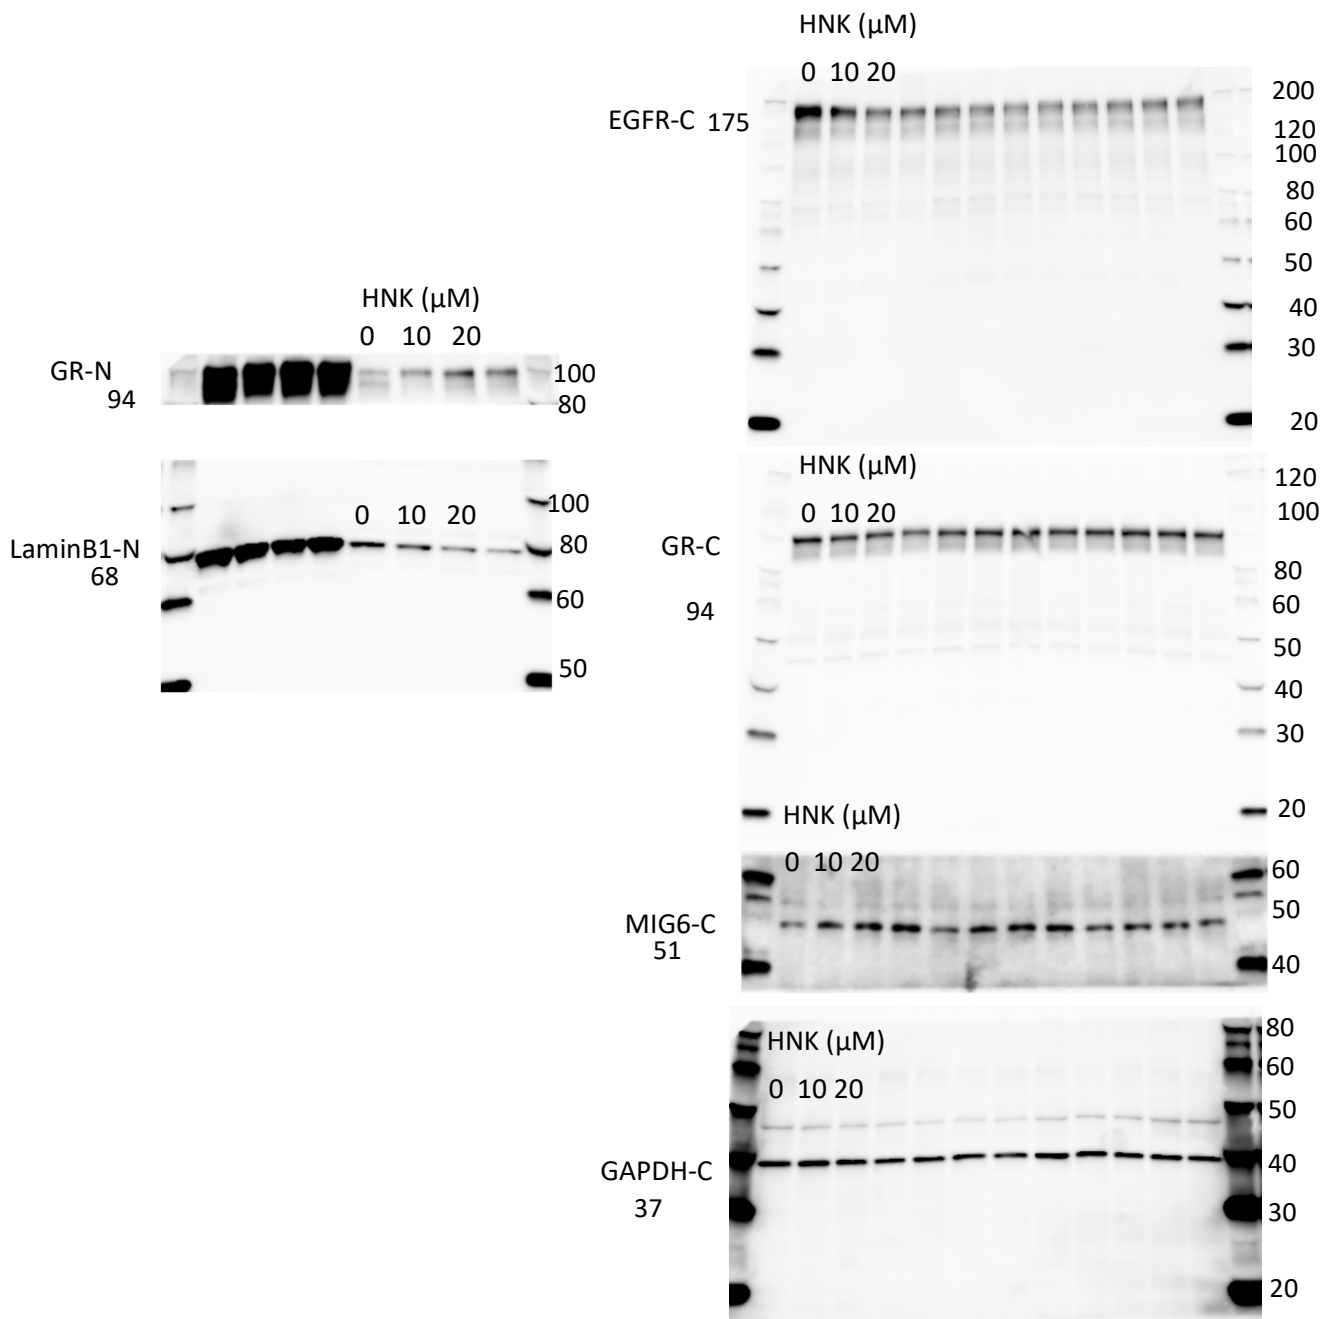

# Figure S3C

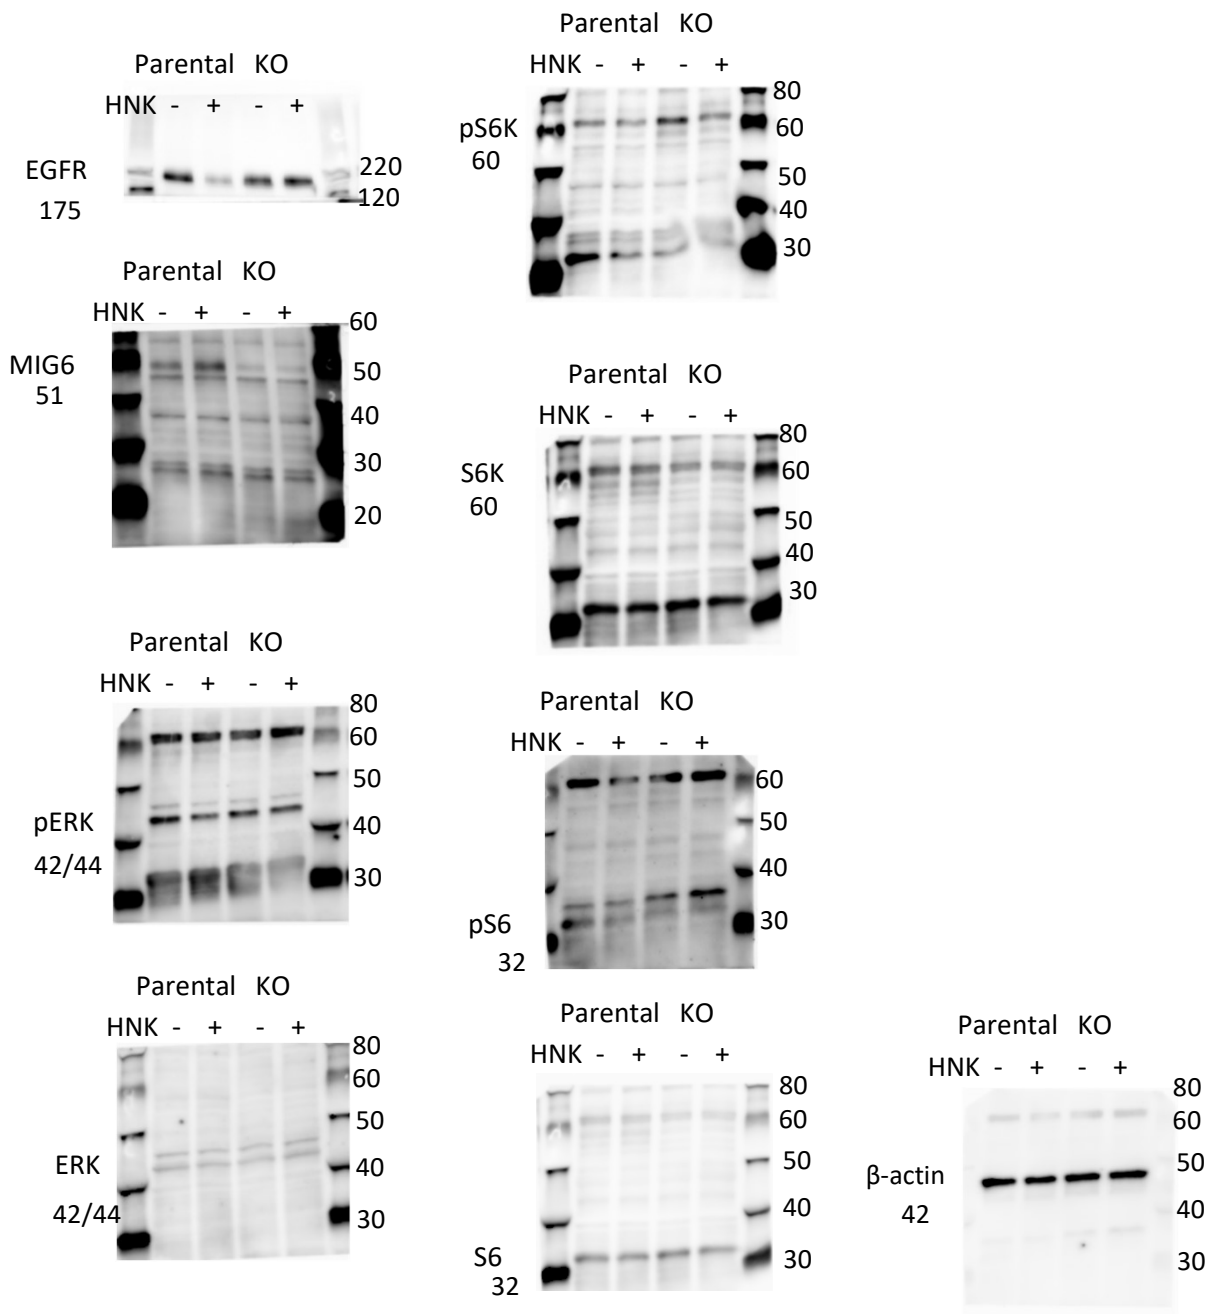

# Figure S4A-Hep3B

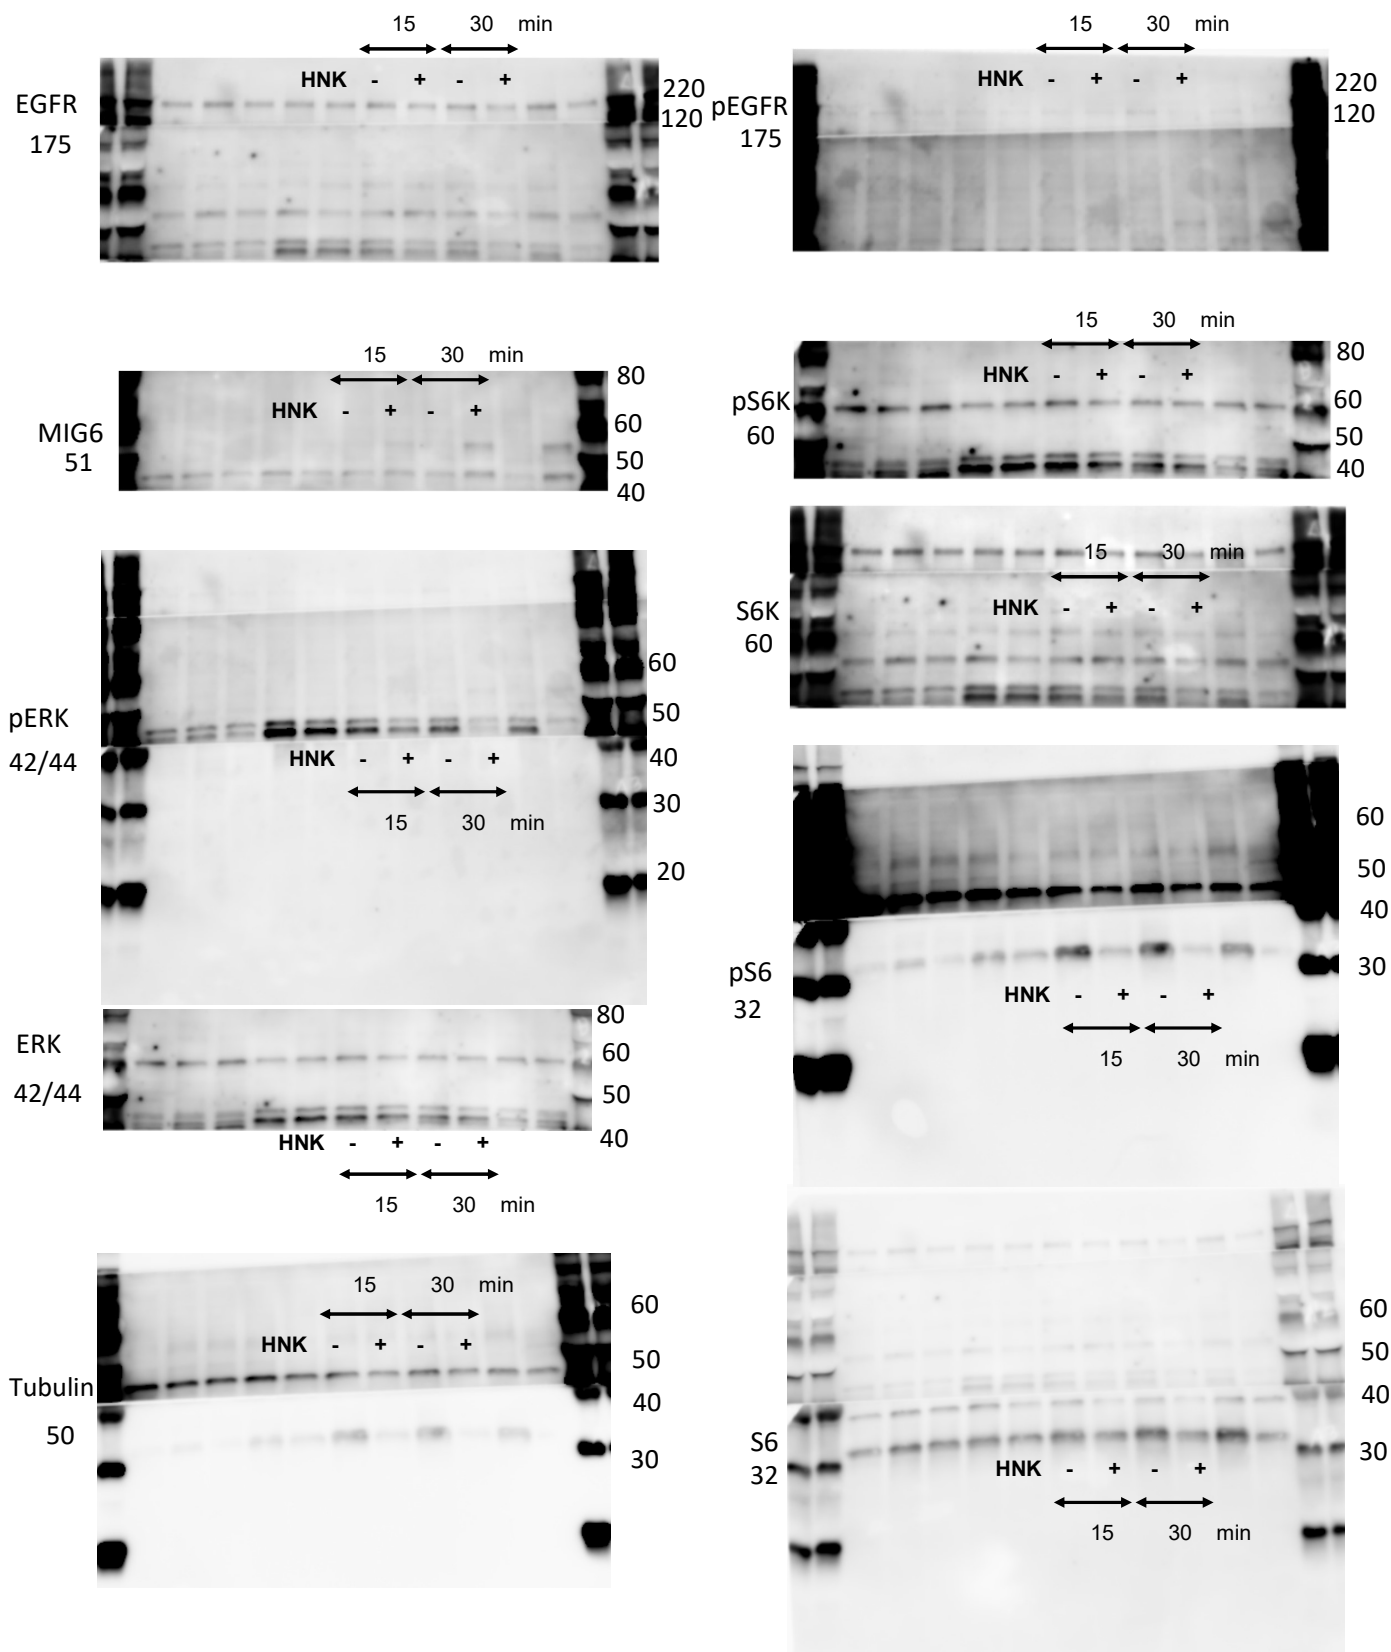

# Figure S4B-Huh6

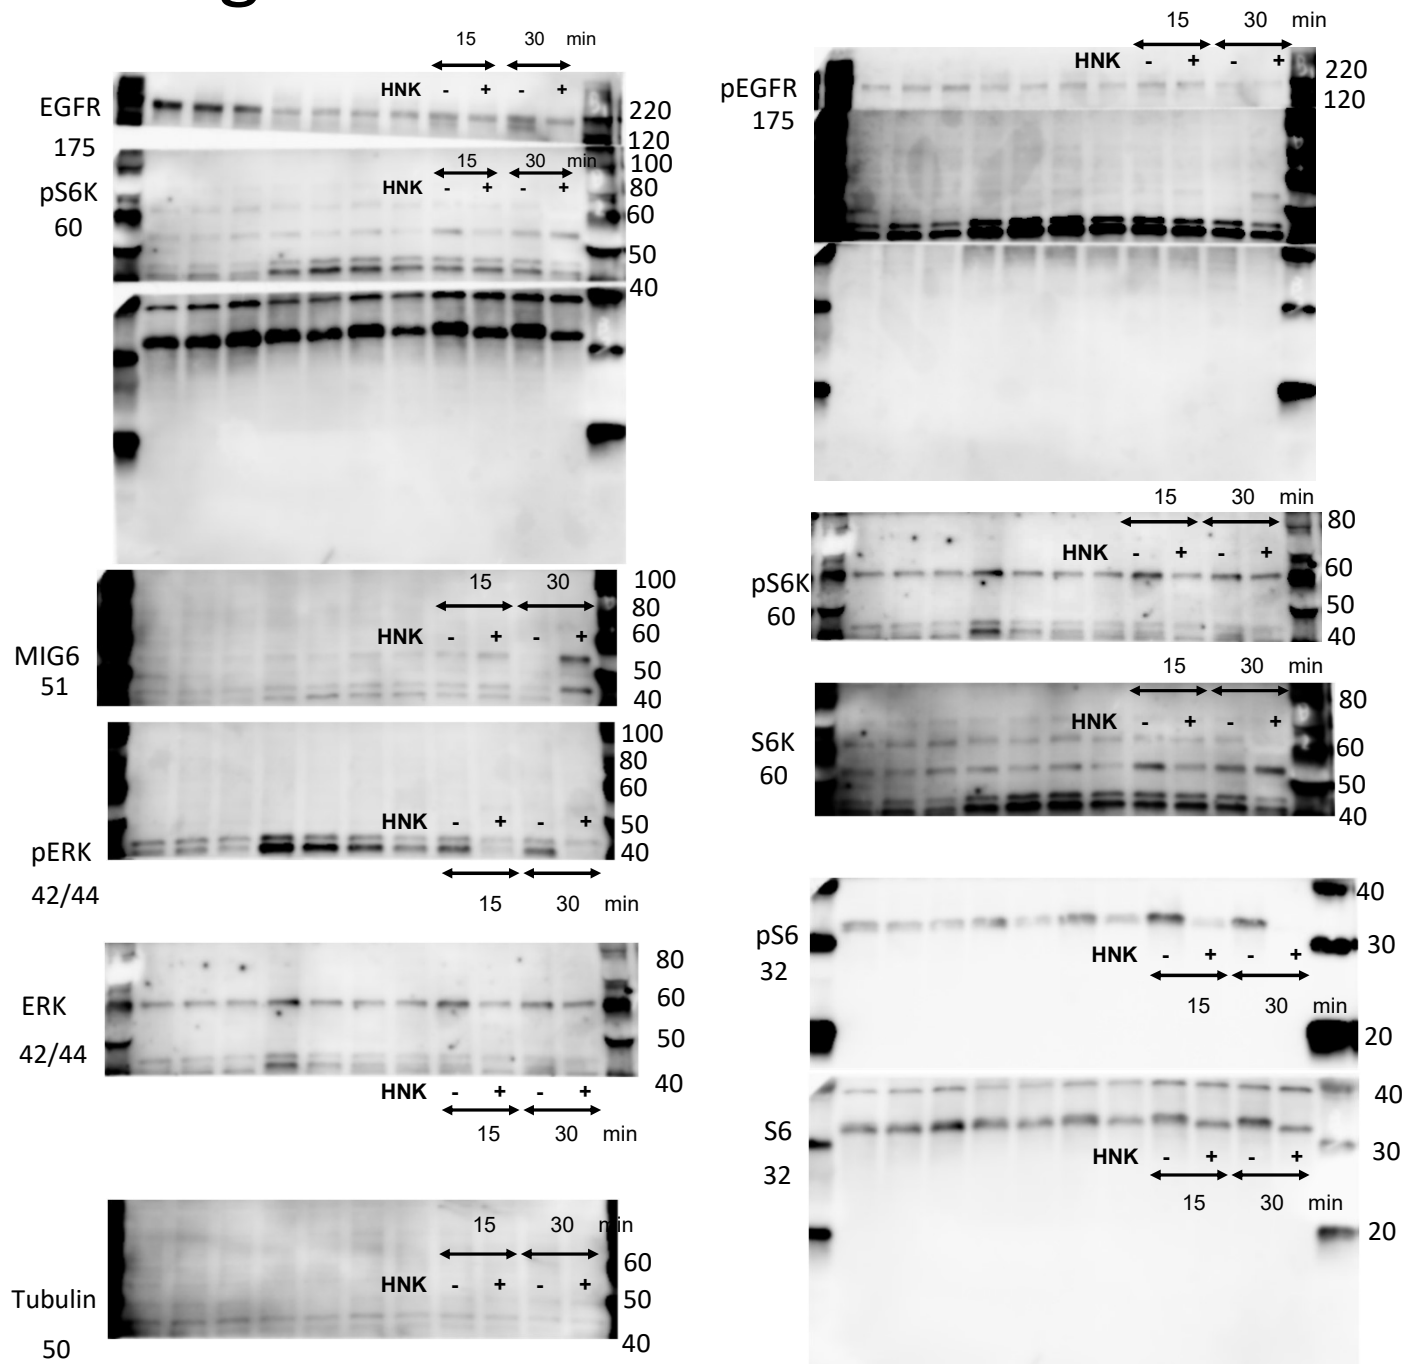

# Figure S5B

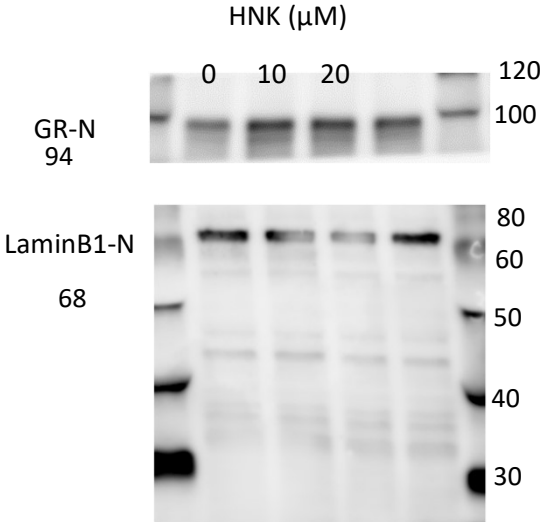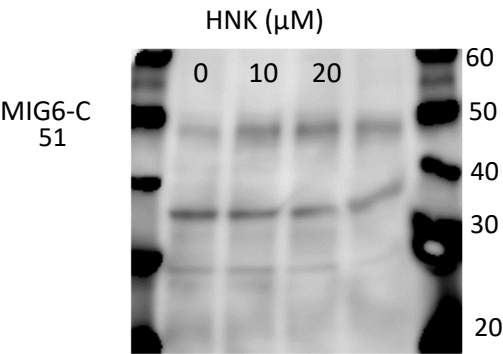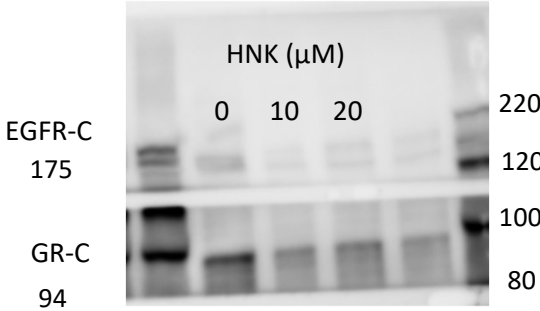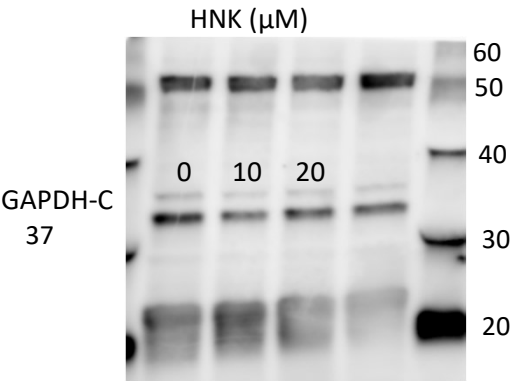

Supplement: s1 [file s1]
